# Supplementary material for: Nitrogen-doped graphene/graphitic carbon nitride with enhanced charge separation and two-electron-transferring reaction activity for boosting photocatalytic hydrogen peroxide production
Source: Royal Society of Chemistry journal article supplement (doi:10.1039/d0se01828g), 2021-01-01
Supplement: d0se01828g1.pdf [file d0se01828g1.pdf]

## Supplementary Material

### **Nitrogen doped Graphene/Graphitic Carbon Nitride with Enhanced Charge Separation and Two-Electrons-Transferring Reaction Activity for Boosting Photocatalytic Hydrogen Peroxide Production**

Muye Liu<sup>a</sup>, Yue Wen<sup>a</sup>, Luhua Lu<sup>a,\*</sup>, Ying Chen<sup>a</sup>, Xiaocong Tian<sup>a</sup>, Hongyun Jin<sup>a</sup>, Jinghai Liu<sup>b,\*</sup> and Kai Dai<sup>c</sup>

<sup>a</sup>.Faculty of Materials Science and Chemistry, China University of Geosciences Wuhan, 68 Jincheng Street, Wuhan 430074, P.R.China. Email: lhlu@cug.edu.cn.

<sup>b</sup>.Inner Mongolia Key Laboratory of Carbon Nanomaterials, College of Chemistry and Materials Science, Inner Mongolia University for Nationalities, Tongliao, 028000, P. R. China. Email: jhliu2008@sinano.ac.cn.

<sup>c</sup>.College of Physics and Electronic Information, Anhui Key Laboratory of Energetic Materials, Huaibei Normal University, Huaibei, 100 Dongshan Road, 235000, P.R. China.

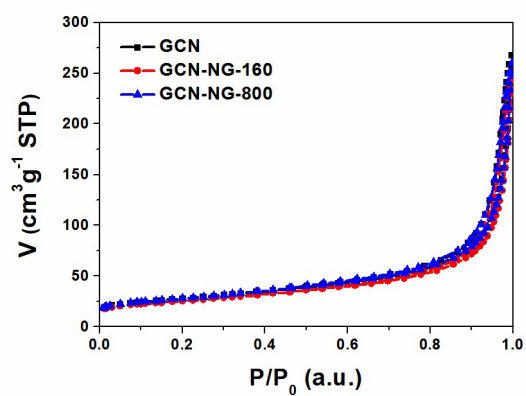

Figure S1.  $\text{N}_2$  adsorption/desorption isotherms (77K) of GCN, GCN-NG-160 and GCN-NG-800 catalysts.

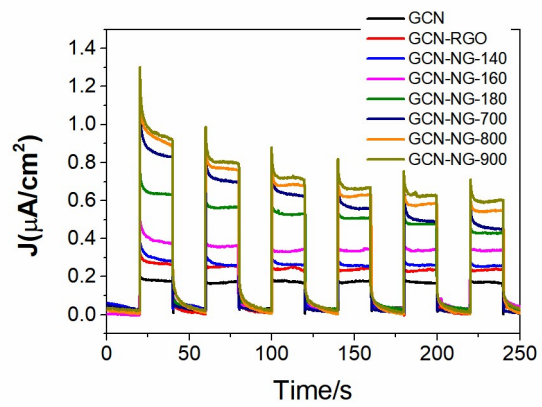

Figure S2. Photocurrent measurement of catalysts in 0.5 M Na<sub>2</sub>SO<sub>4</sub> solution under 0.5 V (vs Ag/AgCl)

Table 1. Apparent quantum efficiency (AQE) at  $\lambda= 420$  nm, 5h irradiation.

| Catalysts  | H <sub>2</sub> O <sub>2</sub> Production | AQE   |
|------------|------------------------------------------|-------|
| GCN        | 124.25 $\mu\text{mol}\cdot\text{g}^{-1}$ | 2.6%  |
| GCN-NG-160 | 288.00 $\mu\text{mol}\cdot\text{g}^{-1}$ | 6.08% |
| GCN-NG-800 | 80.78 $\mu\text{mol}\cdot\text{g}^{-1}$  | 1.7%  |

The average intensity of light incident on the detector is 24.2 mW, and the radius of the light intensity detector is 1cm<sup>2</sup>. The radius of the reactor is 2.5cm<sup>2</sup>, the number of incident photons (N) is  $5.75 \times 10^{21}$  calculated by equation (1).

$$N = \frac{E\lambda}{hc} = \frac{2.5^2 \times 24.2 \times 10^{-3} \times 5 \times 3600 \times 420 \times 10^{-9}}{6.626 \times 10^{-34} \times 3 \times 10^8} = 5.75 \times 10^{21} \quad (1)$$

GCN:

$$\begin{aligned} AQE &= \frac{\text{the number of reacted electrons}}{\text{the number of incident photons}} \times 100\% \\ &= \frac{2 \times 6.022 \times 10^{23} \times 124.28 \times 10^{-6}}{5.75 \times 10^{21}} = 2.6\% \end{aligned}$$

GCN-NG-160:

$$\begin{aligned} AQE &= \frac{\text{the number of reacted electrons}}{\text{the number of incident photons}} \times 100\% \\ &= \frac{2 \times 6.022 \times 10^{23} \times 288 \times 10^{-6}}{5.75 \times 10^{21}} = 6.08\% \end{aligned}$$

GCN-NG-800:

$$AQE = \frac{\text{the number of reacted electrons}}{\text{the number of incident photons}} \times 100\%$$

---

$$= \frac{2 \times 6.022 \times 10^{23} \times 80.78 \times 10^{-6}}{5.75 \times 10^{21}} = 1.7\%$$
